# Supplementary material
Source: PubMed Central journal article supplement (PMC9096597)

## Supplemental Online Content

Zhou M, Ta S, Hahn RT, et al. Percutaneous intramyocardial septal radiofrequency ablation in patients with drug-refractory hypertrophic obstructive cardiomyopathy. *JAMA Cardiol*. Published online March 30, 2022. doi:10.1001/jamacardio.2022.0259

**eFigure.** Study flow chart

This supplemental material has been provided by the authors to give readers additional information about their work.

eFigure. Study flow chart

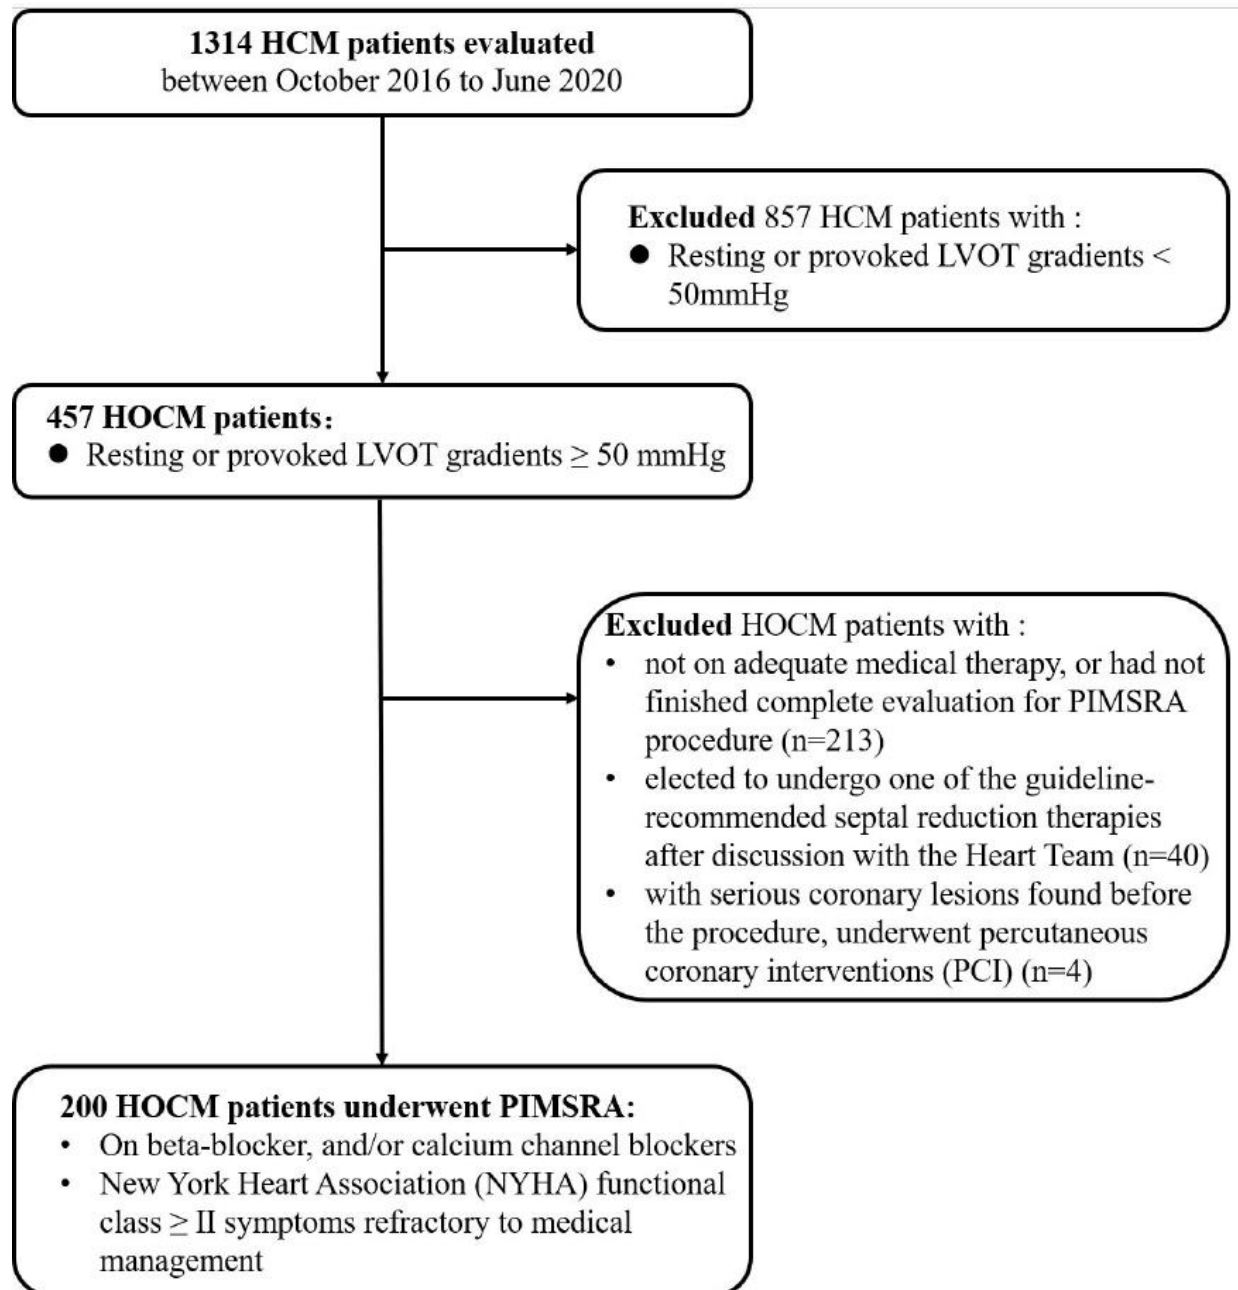

Supplement: jamacardiol-e220259-s001.pdf [file jamacardiol-e220259-s001.pdf]
